# Supplementary material for: Identification of a Topological Characteristic Responsible for the Biological Robustness of Regulatory Networks
Source: PubMed Central journal article supplement (PMC2704863; doi:10.1371/journal.pcbi.1000442), 2009-07-24
Supplement: pcbi.1000442.s002.pdf [file pcbi.1000442.s002.pdf]

# Identification of a Topological Characteristic Responsible for the Biological Robustness of Regulatory Networks

Yangle Wu<sup>1,2</sup>, Xiaomeng Zhang<sup>1,2</sup>, Jianglei Yu<sup>1,2</sup>, Qi Ouyang<sup>1,2,3,\*</sup>

**1** Center for Theoretical Biology, Academy for Advanced Interdisciplinary Studies, Peking University, Beijing, China

**2** The State Key Laboratory for Artificial Microstructures and Mesoscopic Physics, School of Physics, Peking University, Beijing, China

**3** Department of Physics, Hong Kong Baptist University, Kowloon Tong, Hong Kong

\* E-mail: qi@pku.edu.cn

Table S2: The cell-cycle control network of the fission yeast

(Based on Ref. [1])

|           |                     |           |          |                     |          |
|-----------|---------------------|-----------|----------|---------------------|----------|
| Start     | $\bar{\rightarrow}$ | Start     | Start    | $\bar{\rightarrow}$ | SK       |
| SK        | $\bar{\rightarrow}$ | SK        | SK       | $\bar{\rightarrow}$ | Ste9     |
| SK        | $\bar{\rightarrow}$ | Rum1      | Ste9     | $\bar{\rightarrow}$ | Cdc2,13  |
| Ste9      | $\bar{\rightarrow}$ | Cdc2,13*  | Rum1     | $\bar{\rightarrow}$ | Cdc2,13  |
| Rum1      | $\bar{\rightarrow}$ | Cdc2,13*  | Cdc2,13  | $\bar{\rightarrow}$ | Ste9     |
| Cdc2,13   | $\bar{\rightarrow}$ | Rum1      | Cdc2,13  | $\bar{\rightarrow}$ | Cdc2,13  |
| Cdc2,13   | $\bar{\rightarrow}$ | Wee1,Mik1 | Cdc2,13  | $\bar{\rightarrow}$ | Cdc25    |
| Wee1,Mik1 | $\bar{\rightarrow}$ | Cdc2,13*  | Cdc25    | $\bar{\rightarrow}$ | Cdc2,13* |
| Cdc2,13*  | $\bar{\rightarrow}$ | Ste9      | Cdc2,13* | $\bar{\rightarrow}$ | Rum1     |
| Cdc2,13*  | $\bar{\rightarrow}$ | Cdc2,13*  | Cdc2,13* | $\bar{\rightarrow}$ | Slp1     |
| Slp1      | $\bar{\rightarrow}$ | Cdc2,13   | Slp1     | $\bar{\rightarrow}$ | Cdc2,13* |
| Slp1      | $\bar{\rightarrow}$ | Slp1      | Slp1     | $\bar{\rightarrow}$ | PP       |
| PP        | $\bar{\rightarrow}$ | Ste9      | PP       | $\bar{\rightarrow}$ | Rum1     |
| PP        | $\bar{\rightarrow}$ | Wee1,Mik1 | PP       | $\bar{\rightarrow}$ | Cdc25    |
| PP        | $\bar{\rightarrow}$ | PP        |          |                     |          |

---

1. Davidich MI, Bornholdt S (2008) Boolean network model predicts cell cycle sequence of fission yeast. PLoS ONE 3:e1672.
