# Supplementary material for: Identification of a Topological Characteristic Responsible for the Biological Robustness of Regulatory Networks
Source: PubMed Central journal article supplement (PMC2704863; doi:10.1371/journal.pcbi.1000442), 2009-07-24
Supplement: pcbi.1000442.s003.pdf [file pcbi.1000442.s003.pdf]

# Identification of a Topological Characteristic Responsible for the Biological Robustness of Regulatory Networks

Yangle Wu<sup>1,2</sup>, Xiaomeng Zhang<sup>1,2</sup>, Jianglei Yu<sup>1,2</sup>, Qi Ouyang<sup>1,2,3,\*</sup>

**1** Center for Theoretical Biology, Academy for Advanced Interdisciplinary Studies, Peking University, Beijing, China

**2** The State Key Laboratory for Artificial Microstructures and Mesoscopic Physics, School of Physics, Peking University, Beijing, China

**3** Department of Physics, Hong Kong Baptist University, Kowloon Tong, Hong Kong

\* E-mail: qi@pku.edu.cn

Table S3: The guard cell abscisic acid signaling network (ABA)

(Based on Refs. [1, 2])

|            |                   |          |          |                   |            |
|------------|-------------------|----------|----------|-------------------|------------|
| ABA        | $\xrightarrow{+}$ | SphK     | ABA      | $\xrightarrow{+}$ | pHc        |
| ABA        | $\xrightarrow{+}$ | OST1     | ABA      | $\xrightarrow{+}$ | RCN1       |
| ABA        | $\xrightarrow{+}$ | PLC      | ABA      | $\xrightarrow{+}$ | InsPK      |
| ABA        | $\xrightarrow{-}$ | PEPC     | ABA      | $\xrightarrow{-}$ | Malate     |
| ABA        | $\xrightarrow{-}$ | RAC1     | SphK     | $\xrightarrow{+}$ | S1P        |
| S1P        | $\xrightarrow{+}$ | GPA1     | GPA1     | $\xrightarrow{+}$ | PLD        |
| PLD        | $\xrightarrow{+}$ | PA       | PA       | $\xrightarrow{+}$ | ROP2       |
| PA         | $\xrightarrow{-}$ | ABI1     | pHc      | $\xrightarrow{+}$ | Atrboh     |
| pHc        | $\xrightarrow{+}$ | ABI1     | pHc      | $\xrightarrow{-}$ | H+ATPase   |
| pHc        | $\xrightarrow{+}$ | AnionEM  | pHc      | $\xrightarrow{+}$ | KOUT       |
| pHc        | $\xrightarrow{-}$ | KAP      | OST1     | $\xrightarrow{+}$ | Atrboh     |
| ROP2       | $\xrightarrow{+}$ | Atrboh   | Atrboh   | $\xrightarrow{+}$ | ROS        |
| ABI1       | $\xrightarrow{-}$ | Atrboh   | ABI1     | $\xrightarrow{-}$ | AnionEM    |
| ABI1       | $\xrightarrow{-}$ | RAC1     | ROS      | $\xrightarrow{-}$ | ABI1       |
| ROS        | $\xrightarrow{-}$ | H+ATPase | ROS      | $\xrightarrow{+}$ | CaIM       |
| ROS        | $\xrightarrow{-}$ | KOUT     | H+ATPase | $\xrightarrow{-}$ | Depolar    |
| Ca2+c      | $\xrightarrow{-}$ | H+ATPase | Ca2+c    | $\xrightarrow{+}$ | NOS        |
| Ca2+c      | $\xrightarrow{+}$ | PLC      | Ca2+c    | $\xrightarrow{+}$ | Ca2+ATPase |
| Ca2+c      | $\xrightarrow{+}$ | AnionEM  | Ca2+c    | $\xrightarrow{+}$ | KEV        |
| Ca2+c      | $\xrightarrow{+}$ | Depolar  | Ca2+c    | $\xrightarrow{-}$ | KAP        |
| Ca2+c      | $\xrightarrow{+}$ | Actin    | RCN1     | $\xrightarrow{+}$ | NIA12      |
| NIA12      | $\xrightarrow{+}$ | NO       | NOS      | $\xrightarrow{+}$ | NO         |
| NO         | $\xrightarrow{+}$ | GC       | NO       | $\xrightarrow{+}$ | ADPRc      |
| NO         | $\xrightarrow{-}$ | KOUT     | GC       | $\xrightarrow{+}$ | cGMP       |
| ADPRc      | $\xrightarrow{+}$ | cADPR    | cADPR    | $\xrightarrow{+}$ | CIS        |
| cGMP       | $\xrightarrow{+}$ | CIS      | PLC      | $\xrightarrow{+}$ | InsP3      |
| InsP3      | $\xrightarrow{+}$ | CIS      | InsPK    | $\xrightarrow{+}$ | InsP6      |
| InsP6      | $\xrightarrow{+}$ | CIS      | CIS      | $\xrightarrow{+}$ | Ca2+c      |
| Ca2+ATPase | $\xrightarrow{-}$ | Ca2+c    | CaIM     | $\xrightarrow{+}$ | Ca2+c      |
| AnionEM    | $\xrightarrow{+}$ | Depolar  | AnionEM  | $\xrightarrow{-}$ | Malate     |
| AnionEM    | $\xrightarrow{+}$ | Closure  | KEV      | $\xrightarrow{+}$ | Depolar    |
| Depolar    | $\xrightarrow{-}$ | CaIM     | Depolar  | $\xrightarrow{+}$ | KOUT       |
| Depolar    | $\xrightarrow{+}$ | KAP      | KOUT     | $\xrightarrow{-}$ | Depolar    |
| KOUT       | $\xrightarrow{+}$ | Closure  | KAP      | $\xrightarrow{+}$ | Closure    |
| PEPC       | $\xrightarrow{+}$ | Malate   | Malate   | $\xrightarrow{-}$ | Closure    |

(Continued on the next page.)

(Table S3 continued)

|      |                     |       |       |                     |         |
|------|---------------------|-------|-------|---------------------|---------|
| RAC1 | $\bar{\rightarrow}$ | Actin | Actin | $\bar{\rightarrow}$ | Closure |
|------|---------------------|-------|-------|---------------------|---------|

---

1. Li S, Assmann SM, Albert R (2006) Predicting essential components of signal transduction networks: A dynamic model of guard cell abscisic acid signaling. PLoS Biol 4:e312.
2. Albert I, Thakar J, Li S, Zhang R, Albert R (2008) Boolean network simulations for life scientists. Source Code Biol Med 3:16.
