# Supplementary material for: Identification of a Topological Characteristic Responsible for the Biological Robustness of Regulatory Networks
Source: PubMed Central journal article supplement (PMC2704863; doi:10.1371/journal.pcbi.1000442), 2009-07-24
Supplement: pcbi.1000442.s004.pdf [file pcbi.1000442.s004.pdf]

# Identification of a Topological Characteristic Responsible for the Biological Robustness of Regulatory Networks

Yangle Wu<sup>1,2</sup>, Xiaomeng Zhang<sup>1,2</sup>, Jianglei Yu<sup>1,2</sup>, Qi Ouyang<sup>1,2,3,\*</sup>

**1** Center for Theoretical Biology, Academy for Advanced Interdisciplinary Studies, Peking University, Beijing, China

**2** The State Key Laboratory for Artificial Microstructures and  
Mesoscopic Physics, School of Physics, Peking University, Beijing, China

**3** Department of Physics, Hong Kong Baptist University, Kowloon Tong, Hong Kong

\* E-mail: qi@pku.edu.cn

Table S4: The T cell receptor signaling network (TCR)

(Based on Ref. [1])

|        |               |        |         |               |        |
|--------|---------------|--------|---------|---------------|--------|
| bad    | $\rightarrow$ | bclxl  | cabin1  | $\rightarrow$ | calcin |
| calcin | $\rightarrow$ | nfat   | calpr1  | $\rightarrow$ | calcin |
| akap79 | $\rightarrow$ | calcin | cam     | $\rightarrow$ | calcin |
| cam    | $\rightarrow$ | camk4  | cam     | $\rightarrow$ | camk2  |
| camk4  | $\rightarrow$ | cabin1 | card11a | $\rightarrow$ | ikkg   |
| ikkg   | $\rightarrow$ | ikkab  | pkcth   | $\rightarrow$ | ikkg   |
| ccb1p1 | $\rightarrow$ | terb   | ccb1p1  | $\rightarrow$ | zap70  |
| terb   | $\rightarrow$ | terp   | terb    | $\rightarrow$ | dgk    |
| terb   | $\rightarrow$ | pag    | terb    | $\rightarrow$ | fyn    |
| terb   | $\rightarrow$ | lckp2  | terlig  | $\rightarrow$ | terb   |
| zap70  | $\rightarrow$ | ccb1p1 | zap70   | $\rightarrow$ | plcga  |
| zap70  | $\rightarrow$ | gab2   | zap70   | $\rightarrow$ | slp76  |
| zap70  | $\rightarrow$ | p38    | zap70   | $\rightarrow$ | vav1   |
| zap70  | $\rightarrow$ | lat    | zap70   | $\rightarrow$ | itk    |
| zap70  | $\rightarrow$ | sh3bp2 | terp    | $\rightarrow$ | zap70  |
| abl    | $\rightarrow$ | zap70  | cd28    | $\rightarrow$ | cblb   |
| cd28   | $\rightarrow$ | x      | cblb    | $\rightarrow$ | pi3k   |
| dgk    | $\rightarrow$ | dag    | dag     | $\rightarrow$ | pkcth  |
| dag    | $\rightarrow$ | rasgrp | plcga   | $\rightarrow$ | dag    |
| plcga  | $\rightarrow$ | ip3    | erk     | $\rightarrow$ | shp1   |
| erk    | $\rightarrow$ | fos    | erk     | $\rightarrow$ | rsk    |
| shp1   | $\rightarrow$ | lckp1  | lckp1   | $\rightarrow$ | terp   |
| lckp1  | $\rightarrow$ | abl    | lckp1   | $\rightarrow$ | shp1   |
| lckp1  | $\rightarrow$ | fyn    | lckp1   | $\rightarrow$ | rlk    |
| gab2   | $\rightarrow$ | slp76  | gab2    | $\rightarrow$ | shp2   |
| slp76  | $\rightarrow$ | plcga  | slp76   | $\rightarrow$ | itk    |
| gads   | $\rightarrow$ | gab2   | gads    | $\rightarrow$ | slp76  |
| gsk3   | $\rightarrow$ | bcat   | gsk3    | $\rightarrow$ | cyc1   |
| ikb    | $\rightarrow$ | nfbk   | ikkab   | $\rightarrow$ | ikb    |
| camk2  | $\rightarrow$ | ikkab  | pkb     | $\rightarrow$ | bad    |
| pkb    | $\rightarrow$ | gsk3   | pkb     | $\rightarrow$ | fchr   |
| pkb    | $\rightarrow$ | p21c   | pkb     | $\rightarrow$ | p27k   |
| gadd45 | $\rightarrow$ | p38    | cd45    | $\rightarrow$ | lckp1  |
| cd45   | $\rightarrow$ | fyn    | cd4     | $\rightarrow$ | lckp1  |
| csk    | $\rightarrow$ | lckp1  | lckr    | $\rightarrow$ | lckp1  |

(Continued on the next page.)

(Table S4 continued)

|        |                   |         |        |                   |         |
|--------|-------------------|---------|--------|-------------------|---------|
| lckr   | $\xrightarrow{+}$ | fyn     | lckr   | $\xrightarrow{+}$ | lckp2   |
| pag    | $\xrightarrow{+}$ | csk     | ca     | $\xrightarrow{+}$ | cam     |
| ccblr  | $\xrightarrow{+}$ | ccblp1  | ccblr  | $\xrightarrow{+}$ | ccblp2  |
| ccblp2 | $\xrightarrow{-}$ | plcga   | fyn    | $\xrightarrow{+}$ | tcp     |
| fyn    | $\xrightarrow{+}$ | abl     | fyn    | $\xrightarrow{+}$ | pag     |
| fyn    | $\xrightarrow{+}$ | ccblp2  | x      | $\xrightarrow{+}$ | vav1    |
| x      | $\xrightarrow{+}$ | pi3k    | vav1   | $\xrightarrow{+}$ | pkcth   |
| vav1   | $\xrightarrow{+}$ | plcga   | vav1   | $\xrightarrow{+}$ | rac1p1  |
| cdc42  | $\xrightarrow{+}$ | mekk1   | cdc42  | $\xrightarrow{+}$ | sre     |
| mekk1  | $\xrightarrow{+}$ | p38     | mekk1  | $\xrightarrow{+}$ | jnk     |
| mekk1  | $\xrightarrow{+}$ | mkk4    | creb   | $\xrightarrow{+}$ | cre     |
| rasgrp | $\xrightarrow{+}$ | ras     | pdk1   | $\xrightarrow{+}$ | pkcth   |
| pdk1   | $\xrightarrow{+}$ | pkb     | pdk1   | $\xrightarrow{+}$ | p70s    |
| fos    | $\xrightarrow{+}$ | ap1     | rsk    | $\xrightarrow{+}$ | creb    |
| jun    | $\xrightarrow{+}$ | ap1     | lat    | $\xrightarrow{+}$ | gab2    |
| lat    | $\xrightarrow{+}$ | gads    | lat    | $\xrightarrow{+}$ | grb2    |
| lat    | $\xrightarrow{+}$ | hpk1    | lat    | $\xrightarrow{+}$ | plcgb   |
| lat    | $\xrightarrow{+}$ | sh3bp2  | grb2   | $\xrightarrow{+}$ | gab2    |
| grb2   | $\xrightarrow{+}$ | sos     | hpk1   | $\xrightarrow{+}$ | mekk1   |
| hpk1   | $\xrightarrow{+}$ | mlk3    | mlk3   | $\xrightarrow{+}$ | mkk4    |
| ip3    | $\xrightarrow{+}$ | ca      | jnk    | $\xrightarrow{+}$ | jun     |
| plcgb  | $\xrightarrow{+}$ | plcga   | rlk    | $\xrightarrow{+}$ | plcga   |
| lckp2  | $\xrightarrow{+}$ | pi3k    | pi3k   | $\xrightarrow{+}$ | pip3    |
| malt1  | $\xrightarrow{+}$ | card11a | card11 | $\xrightarrow{+}$ | card11a |
| bcl10  | $\xrightarrow{+}$ | card11a | mek    | $\xrightarrow{+}$ | erk     |
| mkk4   | $\xrightarrow{+}$ | jnk     | pip3   | $\xrightarrow{+}$ | pdk1    |
| pip3   | $\xrightarrow{+}$ | itk     | ship1  | $\xrightarrow{-}$ | pip3    |
| pten   | $\xrightarrow{-}$ | pip3    | itk    | $\xrightarrow{+}$ | plcga   |
| rac1p1 | $\xrightarrow{+}$ | mlk3    | rac1p2 | $\xrightarrow{+}$ | mekk1   |
| rac1p2 | $\xrightarrow{+}$ | sre     | rac1r  | $\xrightarrow{+}$ | rac1p1  |
| rac1r  | $\xrightarrow{+}$ | rac1p2  | vav3   | $\xrightarrow{+}$ | rac1p2  |
| raf    | $\xrightarrow{+}$ | mek     | ras    | $\xrightarrow{+}$ | raf     |
| sh3bp2 | $\xrightarrow{+}$ | vav1    | sh3bp2 | $\xrightarrow{+}$ | vav3    |
| sos    | $\xrightarrow{+}$ | ras     | gap    | $\xrightarrow{-}$ | ras     |

- 
1. Saez-Rodriguez J, Simeoni L, Lindquist JA, Hemenway R, Bommhardt U, et al. (2007) A logical model provides insights into t cell receptor signaling. PLoS Comput Biol 3:e163.
